# Supplementary material
Source: PubMed Central journal article supplement (PMC6374096)
Supplement: jcsm.15.2.275s1.pdf [file jcsm.15.2.275s1.pdf]

**Figure S1. Flowchart of study sample selection from National Health Insurance Research Database in Taiwan**

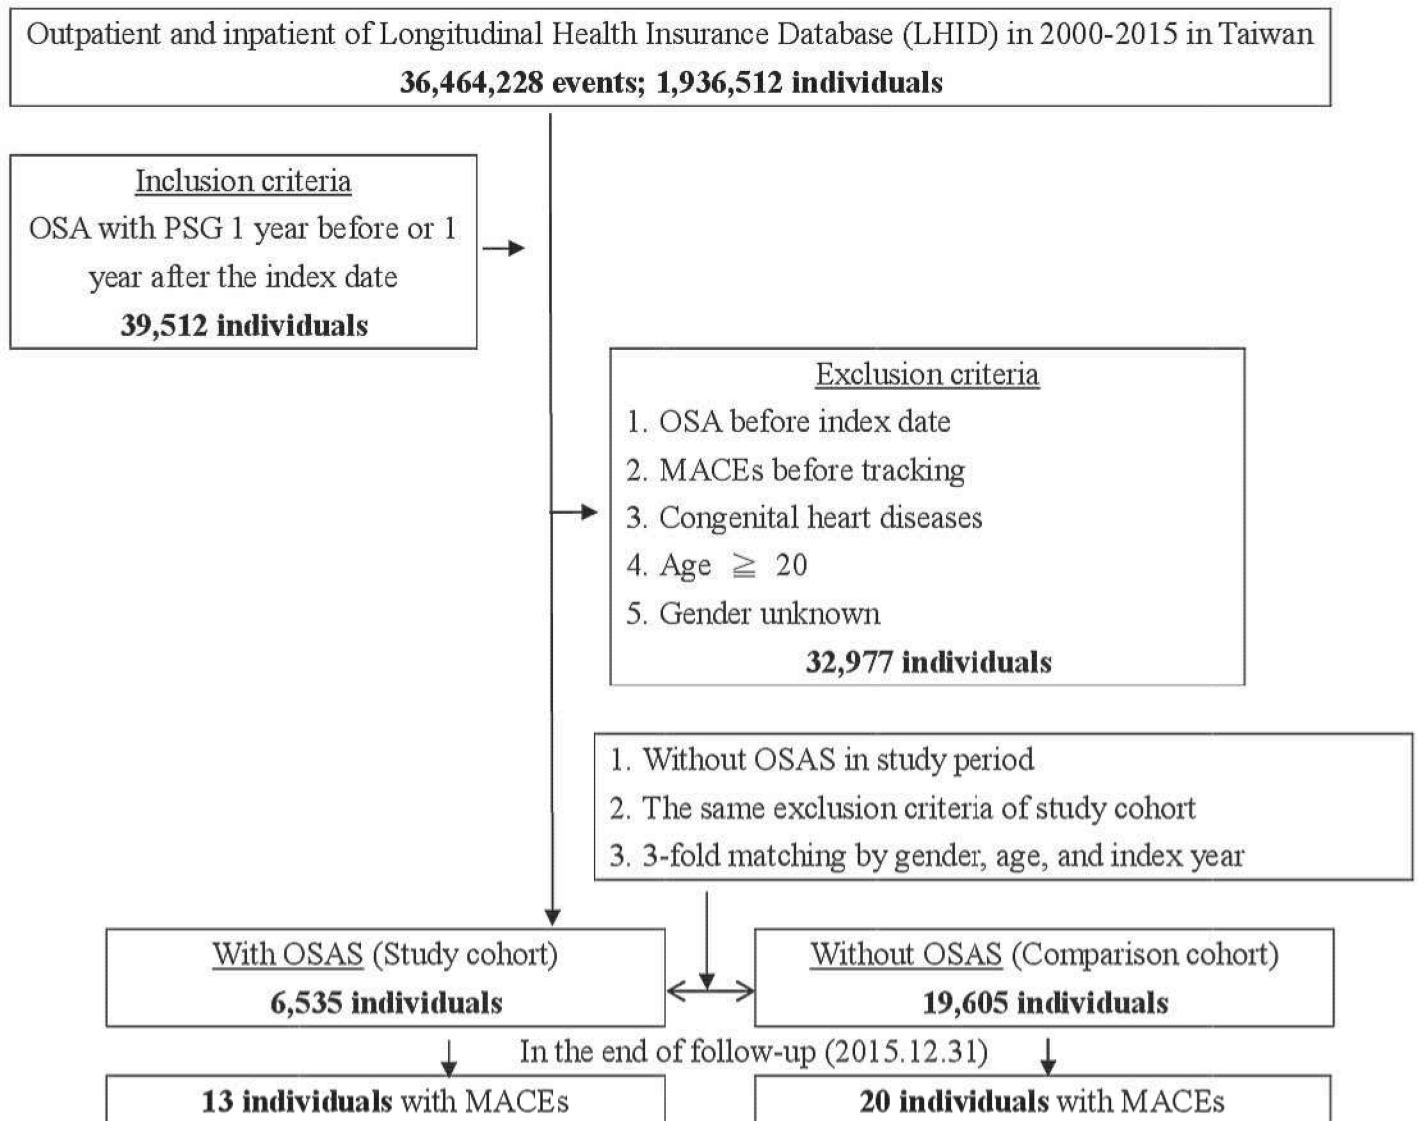

**Table S1. Characteristics of study at the endpoint**

| OSA<br>Variables              | With       |       | Without    |       | <i>P</i> |
|-------------------------------|------------|-------|------------|-------|----------|
|                               | n          | %     | n          | %     |          |
| <b>Total</b>                  | 6,535      | 25.00 | 19,605     | 75.00 |          |
| <b>MACEs</b>                  |            |       |            |       | 0.048    |
| Without                       | 6,522      | 99.80 | 19,585     | 99.90 |          |
| With                          | 13         | 0.20  | 20         | 0.10  |          |
| <b>AMI</b>                    |            |       |            |       | 0.005    |
| Without                       | 6,531      | 99.94 | 19,604     | 99.99 |          |
| With                          | 4          | 0.06  | 1          | 0.01  |          |
| <b>CAD</b>                    |            |       |            |       | 0.045    |
| Without                       | 6,529      | 99.91 | 19,599     | 99.97 |          |
| With                          | 6          | 0.09  | 6          | 0.03  |          |
| <b>PAD</b>                    |            |       |            |       | 0.739    |
| Without                       | 6,534      | 99.98 | 19,603     | 99.99 |          |
| With                          | 1          | 0.02  | 2          | 0.01  |          |
| <b>Acute stroke</b>           |            |       |            |       | 0.414    |
| Without                       | 6,529      | 99.91 | 19,593     | 99.94 |          |
| With                          | 6          | 0.09  | 12         | 0.06  |          |
| <b>Gender</b>                 |            |       |            |       | 0.999    |
| Male                          | 4,442      | 67.97 | 13,326     | 67.97 |          |
| Female                        | 2,093      | 32.03 | 6,279      | 32.03 |          |
| <b>Age (years)</b>            | 22.56±5.31 |       | 22.25±8.73 |       | 0.007    |
| <b>Age group (years)</b>      |            |       |            |       | <0.001   |
| <12                           | 4,321      | 66.12 | 12,198     | 62.22 |          |
| ≥12                           | 2,214      | 33.88 | 7,407      | 37.78 |          |
| <b>Insured premium (NT\$)</b> |            |       |            |       | <0.001   |
| <18,000                       | 6,528      | 99.89 | 19,441     | 99.16 |          |
| 18,000-34,999                 | 5          | 0.08  | 127        | 0.65  |          |
| ≥35,000                       | 2          | 0.03  | 37         | 0.19  |          |
| <b>HTN</b>                    |            |       |            |       | 0.667    |
| Without                       | 6,520      | 99.77 | 19,552     | 99.73 |          |
| With                          | 15         | 0.23  | 53         | 0.27  |          |

|                           |       |           |        |           |        |
|---------------------------|-------|-----------|--------|-----------|--------|
| <b>DM</b>                 |       |           |        |           | 0.091  |
| Without                   | 6,517 | 99.72     | 19,520 | 99.57     |        |
| With                      | 18    | 0.28      | 85     | 0.43      |        |
| <b>Insomnia</b>           |       |           |        |           | 0.004  |
| Without                   | 6,514 | 99.68     | 19,579 | 99.87     |        |
| With                      | 21    | 0.32      | 26     | 0.13      |        |
| <b>ADHD</b>               |       |           |        |           | <0.001 |
| Without                   | 6,454 | 98.76     | 19,601 | 99.98     |        |
| With                      | 81    | 1.24      | 4      | 0.02      |        |
| <b>Asthma</b>             |       |           |        |           | <0.001 |
| Without                   | 6,441 | 98.56     | 18,937 | 96.59     |        |
| With                      | 94    | 1.44      | 668    | 3.41      |        |
| <b>Obesity</b>            |       |           |        |           | <0.001 |
| Without                   | 6,477 | 99.11     | 19,588 | 99.91     |        |
| With                      | 58    | 0.89      | 17     | 0.09      |        |
| <b>CCI_R</b>              |       | 0.04±0.34 |        | 0.10±0.56 | <0.001 |
| <b>Season</b>             |       |           |        |           | <0.001 |
| Spring                    | 1,361 | 20.83     | 4,919  | 25.09     |        |
| Summer                    | 2,407 | 36.83     | 5,441  | 27.75     |        |
| Autumn                    | 1,135 | 17.37     | 4,498  | 22.94     |        |
| Winter                    | 1,632 | 24.97     | 4,747  | 24.21     |        |
| <b>Location</b>           |       |           |        |           | <0.001 |
| Northern Taiwan           | 2,902 | 44.41     | 8,318  | 42.43     |        |
| Middle Taiwan             | 2,150 | 32.90     | 5,485  | 27.98     |        |
| Southern Taiwan           | 1,199 | 18.35     | 4,522  | 23.07     |        |
| Eastern Taiwan            | 269   | 4.12      | 1,111  | 5.67      |        |
| Outlets islands           | 15    | 0.23      | 169    | 0.86      |        |
| <b>Urbanization level</b> |       |           |        |           | <0.001 |
| 1 (The highest)           | 2,974 | 45.51     | 7,260  | 37.03     |        |
| 2                         | 2,541 | 38.88     | 8,350  | 42.59     |        |
| 3                         | 315   | 4.82      | 1,503  | 7.67      |        |
| 4 (The lowest)            | 705   | 10.79     | 2,492  | 12.71     |        |

|                      |       |       |       |        |
|----------------------|-------|-------|-------|--------|
| <b>Level of care</b> |       |       |       | <0.001 |
| Medical center       | 3,514 | 53.77 | 6,740 | 34.38  |
| Regional hospital    | 2,673 | 40.90 | 7,561 | 38.57  |
| Local hospital       | 348   | 5.33  | 5,304 | 27.05  |

---

***P*: Chi-square / Fisher exact test on category variables and t-test on continue variables; OSA = obstructive sleep apnea; NT\$ = New Taiwan Dollars; ADHD = Attention Deficit Hyperactivity Disorder; CCI\_R = Charlson Comorbidity Index, dementia removed**

**Table S2. Years between identification of sleep apnea and MACE occurrence**

|             | Min  | Middle | Max   | Mean $\pm$ SD   |
|-------------|------|--------|-------|-----------------|
| With OSA    | 0.04 | 1.09   | 9.62  | 2.57 $\pm$ 3.01 |
| Without OSA | 0.02 | 3.78   | 14.25 | 6.49 $\pm$ 5.37 |
| Total       | 0.02 | 3.54   | 14.87 | 4.94 $\pm$ 4.93 |

MACE: major adverse cardiovascular events; OSA: obstructive sleep apnea; SD: standard deviation

**Table S3. Factors of MACEs subgroup stratified treatment surgery by using Cox regression**

| Treatment surgery stratified | OSA (With vs. Without) |       | With                           |       | Without                        |       | Adjusted HR | 95% CI | 95% CI | P |
|------------------------------|------------------------|-------|--------------------------------|-------|--------------------------------|-------|-------------|--------|--------|---|
|                              | MACEs subgroup         | Event | Rate (per 10 <sup>5</sup> PYs) | Event | Rate (per 10 <sup>5</sup> PYs) |       |             |        |        |   |
| All patients                 | MACEs                  | 13    | 15.67                          | 20    | 8.20                           | 2.050 | 1.312       | 3.107  | 0.010  |   |
|                              | AMI                    | 4     | 4.82                           | 1     | 0.41                           | 7.945 | 5.345       | 12.911 | 0.003  |   |
|                              | CAD                    | 6     | 7.23                           | 6     | 2.46                           | 2.108 | 1.365       | 3.233  | 0.015  |   |
|                              | PAD                    | 1     | 1.21                           | 2     | 0.82                           | 1.509 | 0.874       | 2.288  | 0.371  |   |
|                              | Acute stroke           | 6     | 7.23                           | 12    | 4.92                           | 1.577 | 1.006       | 2.394  | 0.047  |   |

OSA: Obstructive sleep apnea; HR: hazard ratio; CI: confidence Interval; MACE: major adverse cardiovascular events; PY: person-years

**Table S4. Factors of MACEs stratified by variables listed in the table by using Cox regression**

| OSAS (With vs. Without)       |       | With      |                                |       | Without    |                                |       | Adjusted HR | 95% CI | 95% CI | P |
|-------------------------------|-------|-----------|--------------------------------|-------|------------|--------------------------------|-------|-------------|--------|--------|---|
| Stratified                    | Event | PYs       | Rate (per 10 <sup>5</sup> PYs) | Event | PYs        | Rate (per 10 <sup>5</sup> PYs) |       |             |        |        |   |
| <b>Total</b>                  | 13    | 82,964.08 | 15.67                          | 20    | 243,890.20 | 8.20                           | 2.050 | 1.312       | 3.107  | 0.010  |   |
| <b>Gender</b>                 |       |           |                                |       |            |                                |       |             |        |        |   |
| Male                          | 8     | 54,453.64 | 14.69                          | 14    | 156,629.80 | 8.94                           | 1.541 | 1.001       | 2.371  | 0.049  |   |
| Female                        | 5     | 28,510.44 | 17.54                          | 6     | 87,260.40  | 6.88                           | 3.522 | 2.228       | 5.419  | <0.001 |   |
| <b>Age group (years)</b>      |       |           |                                |       |            |                                |       |             |        |        |   |
| <12                           | 7     | 25,691.44 | 27.25                          | 11    | 84,608.92  | 13.00                          | 2.831 | 1.839       | 4.356  | 0.013  |   |
| ≥12                           | 6     | 57,272.64 | 10.48                          | 9     | 159,281.28 | 5.65                           | 1.595 | 1.036       | 2.454  | 0.028  |   |
| <b>Insured premium (NT\$)</b> |       |           |                                |       |            |                                |       |             |        |        |   |
| <18,000                       | 13    | 82,901.50 | 15.68                          | 20    | 241,347.67 | 8.29                           | 2.050 | 1.312       | 3.107  | 0.010  |   |
| 18,000-34,999                 | 0     | 62.56     | 0.00                           | 0     | 2,003.05   | 0.00                           | -     | -           | -      | -      |   |
| ≥35,000                       | 0     | 0.02      | 0.00                           | 0     | 539.48     | 0.00                           | -     | -           | -      | -      |   |
| <b>HTN</b>                    |       |           |                                |       |            |                                |       |             |        |        |   |
| Without                       | 11    | 82,569.89 | 13.32                          | 20    | 242,244.24 | 8.26                           | 2.050 | 1.312       | 3.107  | 0.010  |   |
| With                          | 2     | 394.19    | 507.37                         | 0     | 1,645.96   | 0.00                           | -     | -           | -      | -      |   |
| <b>DM</b>                     |       |           |                                |       |            |                                |       |             |        |        |   |
| Without                       | 13    | 81,740.37 | 15.90                          | 19    | 241,448.33 | 7.87                           | 2.138 | 1.389       | 3.290  | 0.011  |   |
| With                          | 0     | 1,223.71  | 0.00                           | 1     | 2,441.87   | 40.95                          | 0.000 | -           | -      | 0.896  |   |
| <b>Insomnia</b>               |       |           |                                |       |            |                                |       |             |        |        |   |
| Without                       | 13    | 82,447.29 | 15.77                          | 20    | 243,292.06 | 8.22                           | 2.050 | 1.312       | 3.107  | 0.010  |   |
| With                          | 0     | 516.79    | 0.00                           | 0     | 598.14     | 0.00                           | -     | -           | -      | -      |   |

**ADHD**

|         |    |           |        |    |            |      |       |       |       |       |
|---------|----|-----------|--------|----|------------|------|-------|-------|-------|-------|
| Without | 12 | 82,626.63 | 14.52  | 20 | 243,734.04 | 8.21 | 2.050 | 1.312 | 3.107 | 0.010 |
| With    | 1  | 337.45    | 296.34 | 0  | 156.16     | 0.00 | -     | -     | -     | -     |

**Asthma**

|         |    |           |       |    |            |      |       |       |       |       |
|---------|----|-----------|-------|----|------------|------|-------|-------|-------|-------|
| Without | 11 | 80,661.93 | 13.64 | 20 | 237,014.25 | 8.44 | 2.050 | 1.312 | 3.107 | 0.010 |
| With    | 2  | 2,302.15  | 86.88 | 0  | 6,875.95   | 0.00 | -     | -     | -     | -     |

**Obesity**

|         |    |           |       |    |            |      |       |       |       |       |
|---------|----|-----------|-------|----|------------|------|-------|-------|-------|-------|
| Without | 13 | 81,878.50 | 15.88 | 20 | 243,390.22 | 8.22 | 2.050 | 1.312 | 3.107 | 0.010 |
| With    | 0  | 1,085.58  | 0.00  | 0  | 499.98     | 0.00 | -     | -     | -     | -     |

**Season**

|        |   |           |       |   |           |       |       |       |       |        |
|--------|---|-----------|-------|---|-----------|-------|-------|-------|-------|--------|
| Spring | 3 | 18,441.60 | 16.27 | 7 | 55,430.27 | 12.63 | 1.224 | 0.795 | 1.883 | 0.252  |
| Summer | 3 | 20,255.46 | 14.81 | 4 | 69,097.01 | 5.79  | 2.645 | 1.719 | 4.071 | <0.001 |
| Autumn | 3 | 24,499.25 | 12.25 | 5 | 59,546.47 | 8.40  | 1.783 | 1.158 | 2.746 | 0.024  |
| Winter | 4 | 19,767.77 | 20.23 | 4 | 59,816.45 | 6.69  | 3.883 | 2.523 | 5.975 | 0.005  |

**Urbanization level**

|                 |   |           |       |   |           |       |       |       |       |       |
|-----------------|---|-----------|-------|---|-----------|-------|-------|-------|-------|-------|
| 1 (The highest) | 3 | 28,041.93 | 10.70 | 5 | 75,808.66 | 6.60  | 1.397 | 1.492 | 2.524 | 0.003 |
| 2               | 4 | 26,056.22 | 15.35 | 6 | 58,683.39 | 10.22 | 1.064 | 0.691 | 1.637 | 0.285 |
| 3               | 3 | 17,884.19 | 16.77 | 6 | 73,097.67 | 8.21  | 2.169 | 1.358 | 3.975 | 0.007 |
| 4 (The lowest)  | 3 | 10,981.74 | 27.32 | 3 | 36,300.48 | 8.26  | 2.246 | 1.410 | 3.077 | 0.001 |

**Level of care**

|                   |   |           |       |   |            |      |       |       |       |       |
|-------------------|---|-----------|-------|---|------------|------|-------|-------|-------|-------|
| Hospital center   | 7 | 32,228.23 | 21.72 | 7 | 78,501.32  | 8.92 | 2.292 | 1.489 | 3.527 | 0.017 |
| Regional hospital | 5 | 35,528.93 | 14.07 | 9 | 102,996.27 | 8.74 | 2.015 | 1.309 | 3.101 | 0.003 |
| Local hospital    | 1 | 15,206.92 | 6.58  | 4 | 62,392.61  | 6.41 | 1.357 | 0.882 | 2.089 | 0.247 |

**OSA = obstructive sleep apnea; HR= hazard ratio, CI = confidence interval, Adjusted HR: Adjusted variables listed in the table; NT\$ = New Taiwan Dollars; ADHD = Attention Deficit Hyperactivity Disorder; CCI\_R = Charlson Comorbidity Index, dementia removed, PYs = Person-years;**
